# Supplementary material
Source: PubMed Central journal article supplement (PMC3235697)
Supplement: NIHMS339895-supplement-SI.pdf [file NIHMS339895-supplement-SI.pdf]

**SUPPLEMENTARY INFORMATION**

**Predicting the Survival of Ischaemic Bowel in Preclinical Model Systems using  
Intraoperative Near-Infrared Fluorescence Angiography**

Aya Matsui, M.D.<sup>1,2</sup>, Joshua H. Winer, M.D.<sup>3</sup>, Rita G. Laurence, B.S.<sup>1</sup>,  
and John V. Frangioni, M.D., Ph.D.<sup>1,4</sup>

<sup>1</sup>Division of Haematology/Oncology, Beth Israel Deaconess Medical Centre, Boston, MA,

<sup>2</sup>Division of Cancer Diagnostics and Therapeutics, Hokkaido University Graduate School of  
Medicine, Sapporo, Japan, <sup>3</sup>Department of Surgery, Brigham & Women's Hospital, Boston, MA  
and <sup>4</sup>Department of Radiology, Beth Israel Deaconess Medical Centre, Boston, MA

\* To whom all correspondence should be addressed:

John V. Frangioni, M.D., Ph.D.

BIDMC, Room SL-B05

330 Brookline Avenue

Boston, MA 02215

617-667-0692 FAX: 617-667-0981

Email: [jfrangio@bidmc.harvard.edu](mailto:jfrangio@bidmc.harvard.edu)

Supplementary Table S1 - Region of Interest (ROI) Numbering System for Mesenteric Vascular

Occlusion of Pig Bowel.

| Length of Ischaemia | N | ROI Number           |   |   |     |     |     |   |   |   |                           |    |    |     |     |     |    |    |    |
|---------------------|---|----------------------|---|---|-----|-----|-----|---|---|---|---------------------------|----|----|-----|-----|-----|----|----|----|
|                     |   | Mesenteric Side (Me) |   |   |     |     |     |   |   |   | Anti-Mesenteric Side (AM) |    |    |     |     |     |    |    |    |
| Short (2-3 cm)      | 8 | 1                    | 2 | 3 | n/a | n/a | n/a | 3 | 4 | 5 | 6                         | 7  | 8  | n/a | n/a | n/a | 8  | 9  | 10 |
| Medium (4-5 cm)     | 8 | 1                    | 2 | 3 | 4   | n/a | 4   | 5 | 6 | 7 | 8                         | 9  | 10 | 11  | n/a | 11  | 12 | 13 | 14 |
| Long (6-12 cm)      | 8 | 1                    | 2 | 3 | 4   | 5   | 6   | 7 | 8 | 9 | 10                        | 11 | 12 | 13  | 14  | 15  | 16 | 17 | 18 |

N = Number of animals in each group; n/a = not applicable

Supplementary Table S2 - Distribution of Perfusion Patterns after Mesenteric Vascular Occlusion of Pig Bowel.

| ROI Number                 |                   | Mesenteric Side |   |   |     |     |     |   |   |   | Anti-Mesenteric Side |    |    |     |     |     |    |    |    |
|----------------------------|-------------------|-----------------|---|---|-----|-----|-----|---|---|---|----------------------|----|----|-----|-----|-----|----|----|----|
|                            |                   | 1               | 2 | 3 | 4   | 5   | 6   | 7 | 8 | 9 | 10                   | 11 | 12 | 13  | 14  | 15  | 16 | 17 | 18 |
| Length of Ischemic Segment | Short<br>(n = 8)  | A               | A | A | n/a | n/a | n/a | A | A | A | A                    | A  | A  | n/a | n/a | n/a | A  | A  | A  |
|                            |                   | A               | A | A | n/a | n/a | n/a | A | A | A | A                    | A  | A  | n/a | n/a | n/a | A  | A  | A  |
|                            |                   | A               | A | A | n/a | n/a | n/a | A | A | A | A                    | A  | A  | n/a | n/a | n/a | A  | A  | A  |
|                            |                   | A               | A | A | n/a | n/a | n/a | A | A | A | A                    | A  | A  | n/a | n/a | n/a | A  | A  | A  |
|                            |                   | A               | A | A | n/a | n/a | n/a | A | A | A | A                    | A  | A  | n/a | n/a | n/a | A  | A  | A  |
|                            |                   | A               | A | A | n/a | n/a | n/a | A | A | A | A                    | A  | A  | n/a | n/a | n/a | A  | A  | A  |
|                            |                   | A               | A | A | n/a | n/a | n/a | A | A | A | A                    | A  | A  | n/a | n/a | n/a | A  | A  | A  |
|                            |                   | A               | A | D | n/a | n/a | n/a | D | A | A | A                    | D  | D  | n/a | n/a | n/a | D  | A  | A  |
|                            | Medium<br>(n = 8) | A               | A | D | C   | n/a | C   | D | A | A | A                    | A  | D  | C   | n/a | C   | A  | A  | A  |
|                            |                   | A               | A | D | C   | n/a | C   | D | A | A | A                    | A  | D  | C   | n/a | C   | D  | A  | A  |
|                            |                   | A               | A | D | C   | n/a | C   | D | A | A | A                    | A  | D  | C   | n/a | C   | D  | A  | A  |
|                            |                   | A               | A | D | C   | n/a | C   | D | D | A | A                    | A  | D  | C   | n/a | C   | C  | D  | A  |
|                            |                   | A               | A | D | C   | n/a | C   | C | D | A | A                    | A  | D  | C   | n/a | C   | C  | D  | A  |
|                            |                   | A               | A | D | C   | n/a | C   | C | D | A | A                    | A  | D  | C   | n/a | C   | C  | D  | A  |
|                            |                   | A               | A | D | C   | n/a | C   | C | D | A | A                    | A  | C  | C   | n/a | C   | C  | C  | A  |
|                            |                   | A               | A | D | C   | n/a | C   | C | D | A | A                    | A  | C  | C   | n/a | C   | C  | C  | A  |
|                            | Long<br>(n = 8)   | A               | A | D | C   | C   | D   | D | A | A | A                    | A  | D  | C   | C   | C   | C  | A  | A  |
|                            |                   | A               | A | D | C   | C   | C   | D | D | A | A                    | A  | D  | C   | C   | C   | C  | A  | A  |
|                            |                   | A               | A | D | C   | C   | C   | D | D | A | A                    | A  | D  | C   | C   | C   | C  | A  | A  |
|                            |                   | A               | D | D | C   | C   | C   | D | D | A | A                    | D  | D  | C   | X   | C   | C  | D  | A  |
|                            |                   | A               | D | C | C   | X   | C   | D | D | A | A                    | D  | C  | C   | X   | C   | X  | D  | A  |
|                            |                   | A               | D | C | C   | X   | X   | C | D | A | A                    | C  | C  | C   | X   | C   | X  | D  | A  |
|                            |                   | A               | D | C | C   | X   | X   | C | D | A | A                    | C  | C  | C   | X   | C   | X  | D  | A  |
|                            |                   | A               | D | C | X   | X   | X   | C | D | A | A                    | C  | C  | X   | X   | C   | X  | D  | A  |

A = Arterial Pattern, D = Delayed Drainage Pattern, C = Capillary Pattern, X = Arterial Insufficient Pattern, n/a; not applicable.

Table S3 – Microscopic criteria in the grading of intestinal tissue injury after strangulation ischaemia and the distribution of histological grade in evaluated intestinal specimens.

| <b>Grade</b> | <b>Description</b>                    | <b>Number of Specimens</b> |
|--------------|---------------------------------------|----------------------------|
| 0            | Normal mucosa                         | 33                         |
| 1            | Subepithelial space at villus tip     | 43                         |
| 2            | More extended subepithelial space     | 29                         |
| 3            | Epithelial lifting along villus sides | 28                         |
| 4            | Denuded villi                         | 18                         |
| 5            | Loss of villus tissue                 | 7                          |
| 6            | Crypt layer infarction                | 29                         |
| 7            | Transmucosal infarction               | 14                         |
| 8            | Transmural infarction                 | 89                         |

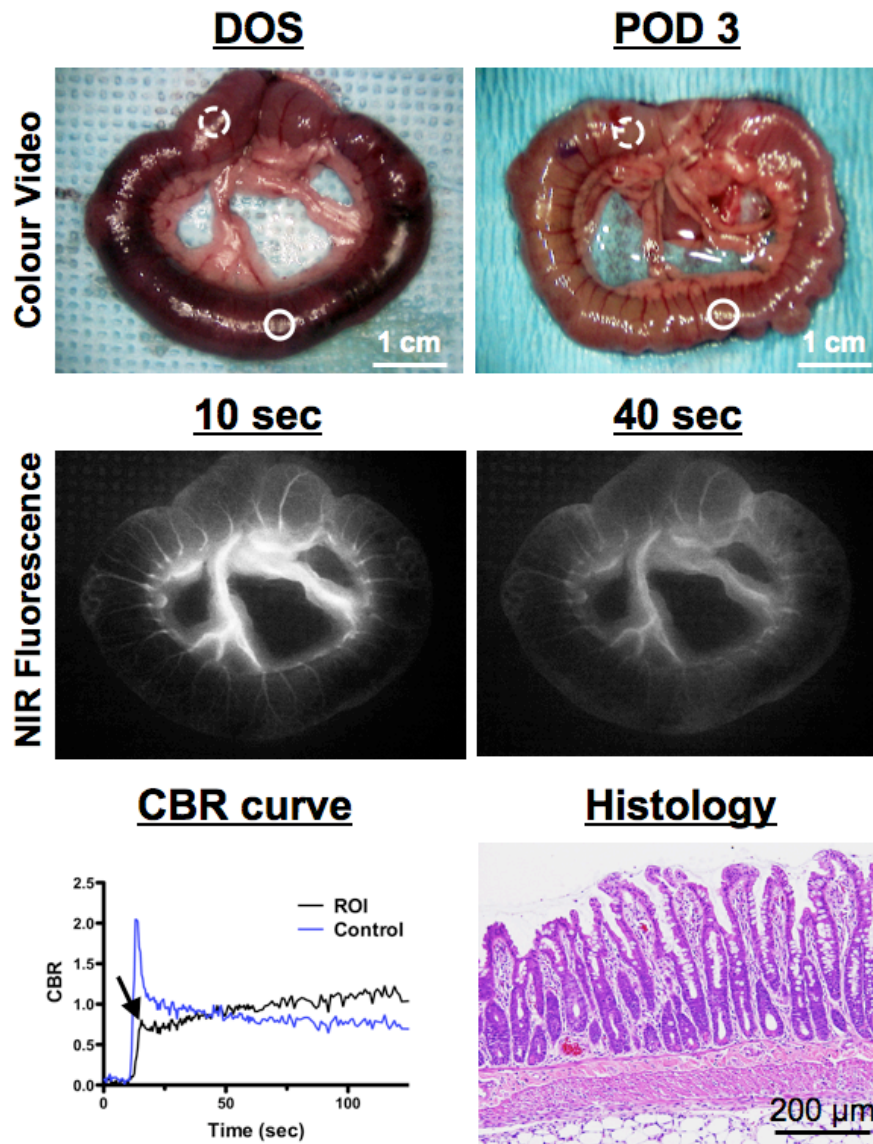

Supplementary Figure S1 – Macroscopic, Physiologic, and Microscopic Analysis of Bowel Strangulation in the Rat: Macroscopic colour video image seen at 1 h of strangulation on the day of surgery (DOS; top left) and at 3 days postoperatively (POD 3; top right). ROI (circle) of ischaemic bowel and ROI (dashed circle) of control bowel are also shown. The ischaemic ROI was judged clinically to be nonviable at DOS, but was actually found to be viable at POD 3. No fluorescence defect was recognized in the NIR fluorescence image at 10 s (middle left) or 40 s (middle right) postinjection of 0.15 mg/kg ICG on the DOS. An inflow peak was present in the CBR-time curve of both ischaemic bowel (arrow) and control (bottom left). Camera exposure time was 60 ms. Histological grade was assessed as Grade 2 (bottom right) according to the criteria described in Table S3.

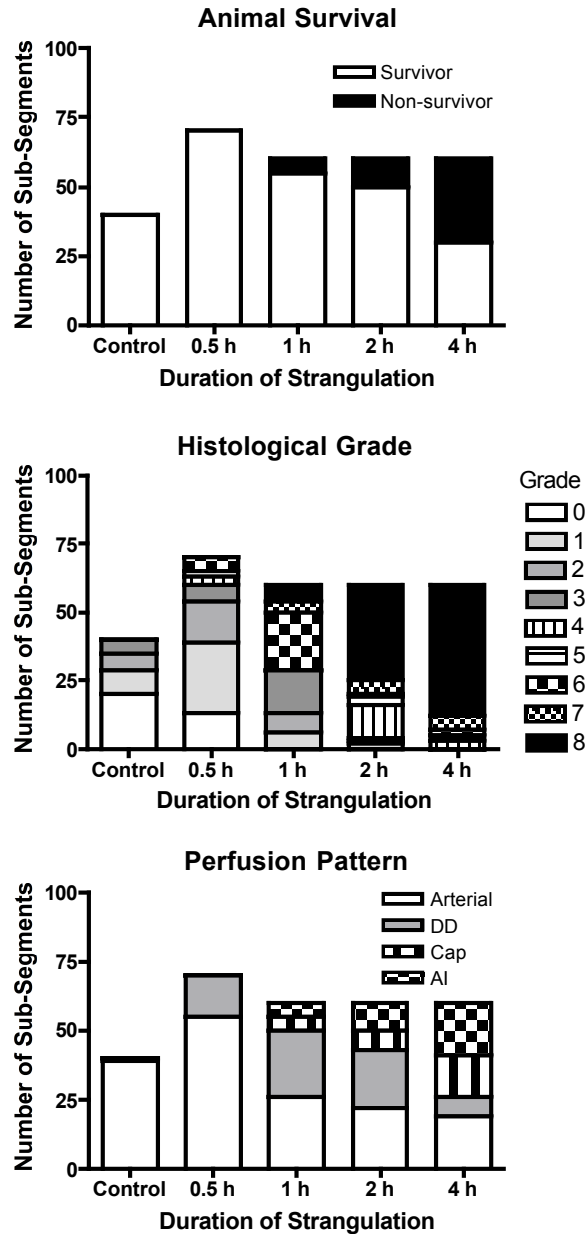

Supplementary Figure S2 – Clinical and qualitative CBR-time curve outcomes as a function of strangulation duration: Shown are animal survival (top), histological grade (middle), and tissue perfusion pattern (bottom) on POD 3 as function of duration of strangulation and the number of sub-segments involved. Vascular patterns included normal (arterial), DD = delayed drainage pattern, Cap = capillary pattern, and AI = arterial insufficient pattern.

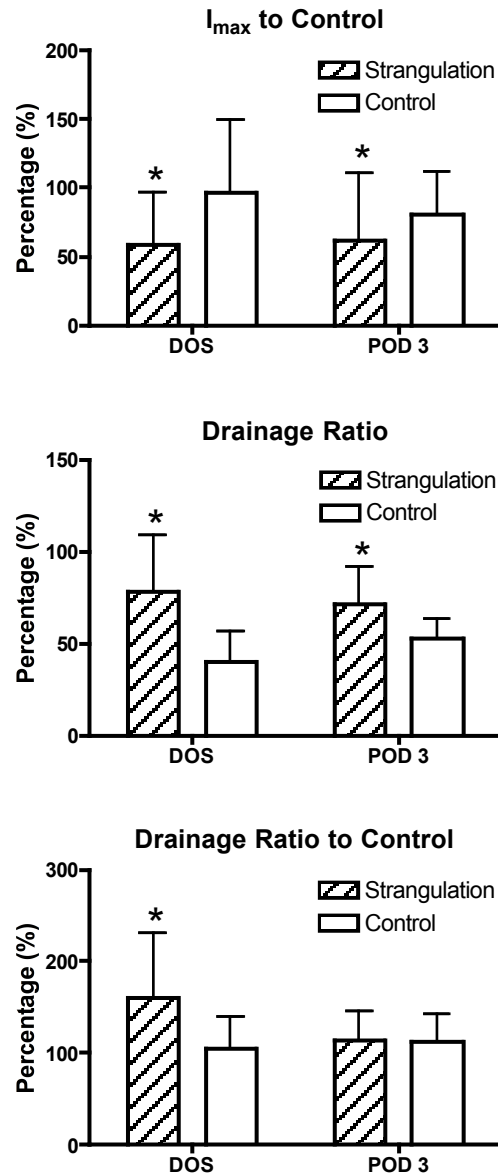

Supplementary Figure S3 – Impact of the presence or absence of strangulation on quantitative metrics of tissue perfusion: Shown are the  $I_{max}$  to control ratio (top), drainage ratio (DR) (middle), and DR to control (bottom) in the presence or absence of strangulation, and on the day of surgery (DOS) vs. post-operative day 3 (POD 3). Box and error bar represent mean and SD, respectively. Asterisks indicate statistical significance as described in the text.

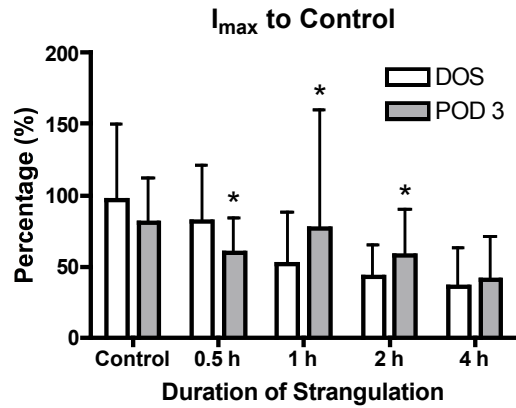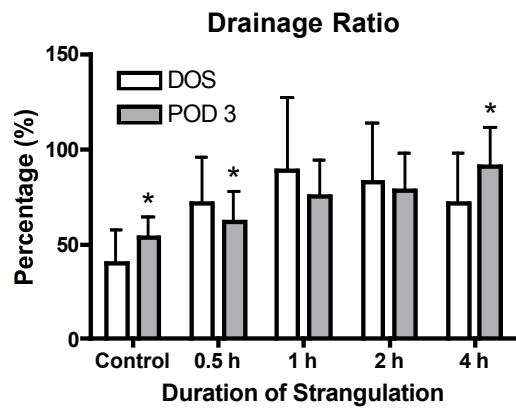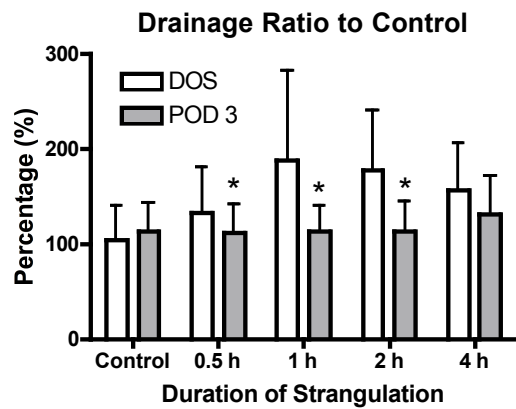

Supplementary Figure S4 – Impact of strangulation duration on quantitative metrics of tissue perfusion: Changes in the I<sub>max</sub> to control ratio (top), drainage ratio (DR; middle), and DR to control (bottom) as a function of the duration of strangulation, and on the day of surgery (DOS) vs. post-operative day 3 (POD 3). Box and error bar represent mean and SD, respectively. Asterisks indicate statistical significance as described in the text.
